# Supplementary material for: Encapsulating nano rods of copper–biphenylamines framework on g-C3N4 photocatalysts for visible-light-driven organic dyes degradation: promoting charge separation efficiency
Source: Royal Society of Chemistry journal article supplement (doi:10.1039/c7cy00420f), 2017-01-01

## **Electronic Supplementary Information (ESI)**

### **Encapsulating Nano Rods of Copper– Biphenylamines Framework on g-C<sub>3</sub>N<sub>4</sub> Photocatalysts for Visible-Light-Driven Organic Dyes Degradation: Promoting Charge Separation Efficiency**

Muhammad Asim Khan\*, Mingzhu Xia, Sadaf Mutahir, Tahir Muhmood, Wu Lei and Fengyun Wang\*

Chemical Engineering School, Nanjing University of Science and Technology, Xiaolingwei 200, Nanjing 210094, P.R.China.

## **NMR Data of the Synthesized Cu Complexes.**

### **Cu(BN)**

Microanalytical data (%). Found: C, 36.47; H, 3.71; N, 6.96. Calc: C, 36.81; H, 3.65; N, 7.08

<sup>1</sup>H-NMR: (500 MHz, DMSO): 9.41 (s, <sup>+</sup>NH<sub>3</sub>), 7.72 (s, 4H, ArH), 7.25 (s, 4H, ArH),

The appearance of signal at 9.49 and the disappearance of NH<sub>2</sub> at 6.5- 6.00 region indicate the presence of <sup>+</sup>NH<sub>3</sub>

### **Cu(BA)**

Microanalytical data (%). Found: C, 52.63; H, 4.18; N, 4.84. Calc: C, 52.73; H, 4.39; N, 5.09.

<sup>1</sup>H-NMR: (500 MHz, DMSO): 8.50 (s, <sup>+</sup>NH<sub>3</sub>), 7.92 (d, 2H, *j* = 7.93, ArH), 7.23-7.08 (m, 6H, ArH), 6.97 (m, 1H, ArH)

In this case signal of <sup>+</sup>NH<sub>3</sub> appeared at 8.50.

### **Cu(PD)**

Microanalytical data (%). Found: C, 22.66; H, 3.11; N, 8.71. Calc: C, 22.74; H, 3.22; N, 8.76.

<sup>1</sup>H-NMR: (500 MHz, DMSO): 9.59 (s, <sup>+</sup>NH<sub>3</sub>), 7.42 (s, 4H, ArH).

In this case signal of <sup>+</sup>NH<sub>3</sub> appeared at 9.01.

While the all others signals of aromatic protons appeared in their respected reigons.

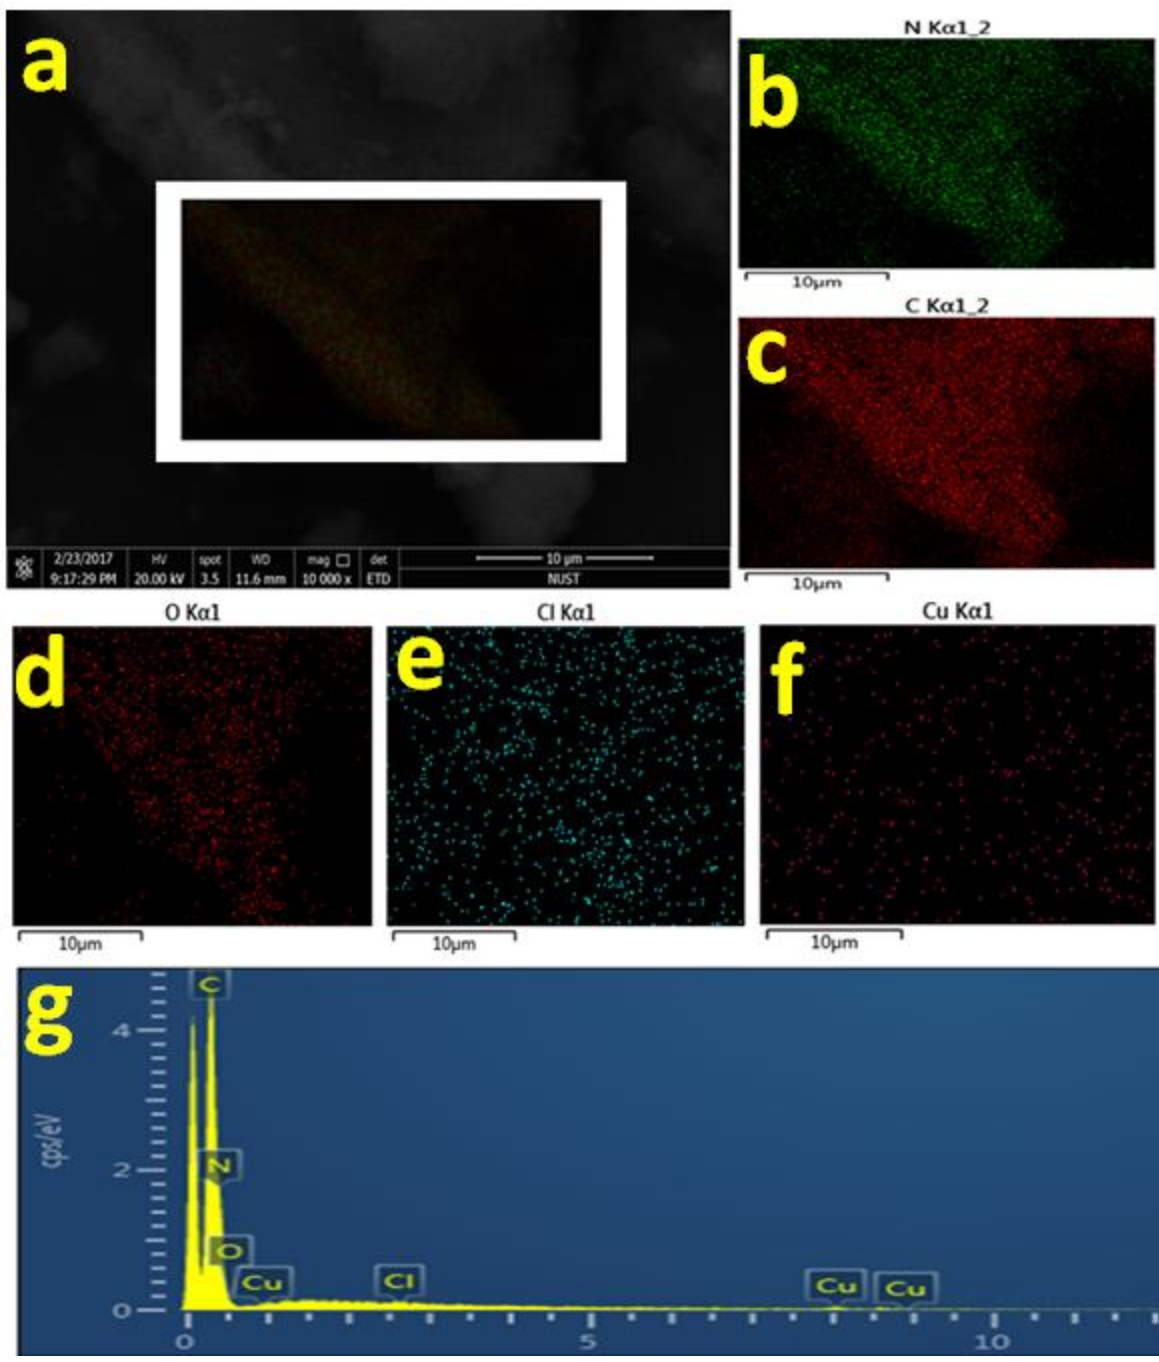

Fig. S1: SEM image of CN-Cu(BN) (a), and Copper, Chlorine, Carbon, Oxygen and Nitrogen (b, c, d, e, f & g) distribution by SEM-EDS mapping of CN-Cu(BN).

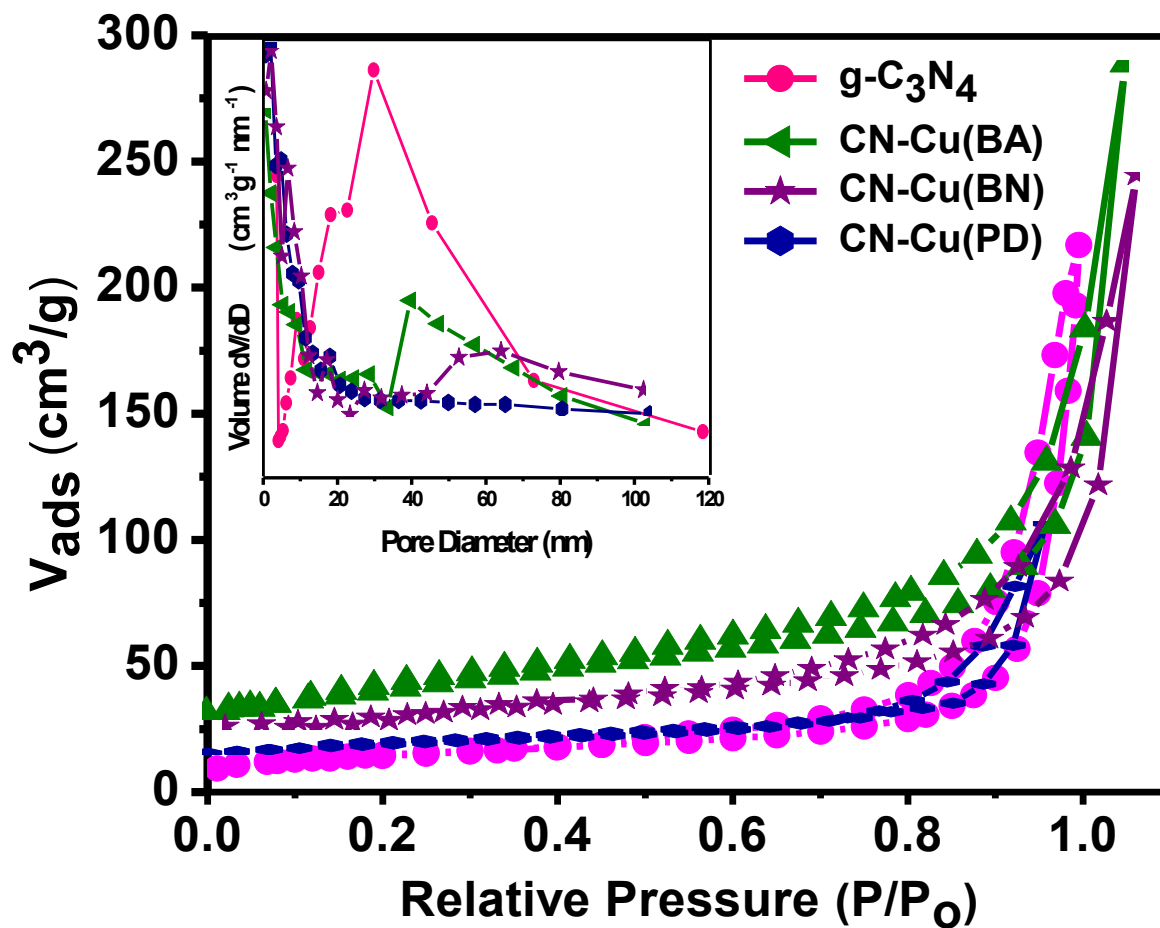

**Fig. S2.** Nitrogen adsorption-desorption isotherms and the corresponding Barrett-Joyner-Halenda (BJH) pore-size distribution curve of pure  $g\text{-C}_3\text{N}_4$  and reformed samples. The pore-size distribution was determined from the desorption branch of the isotherms.

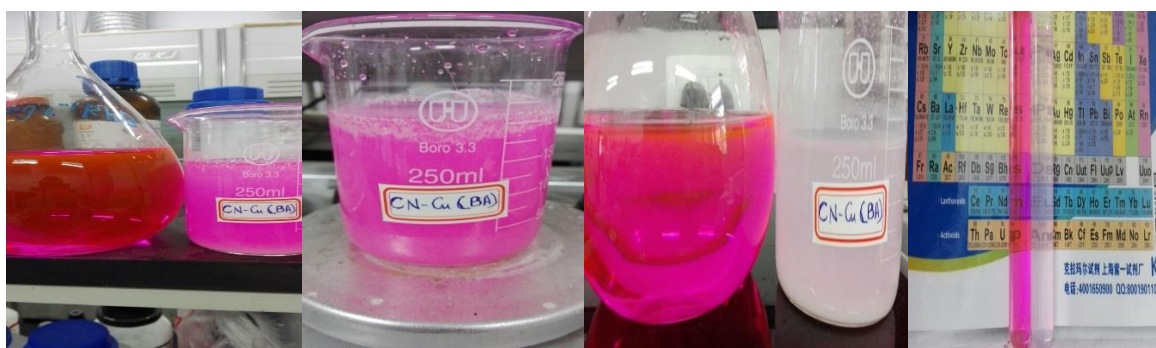

**Fig. S3.** Degradation of RhB with CN-Cu(BA) under normal room light (109 Lux) and open atmosphere of the lab.

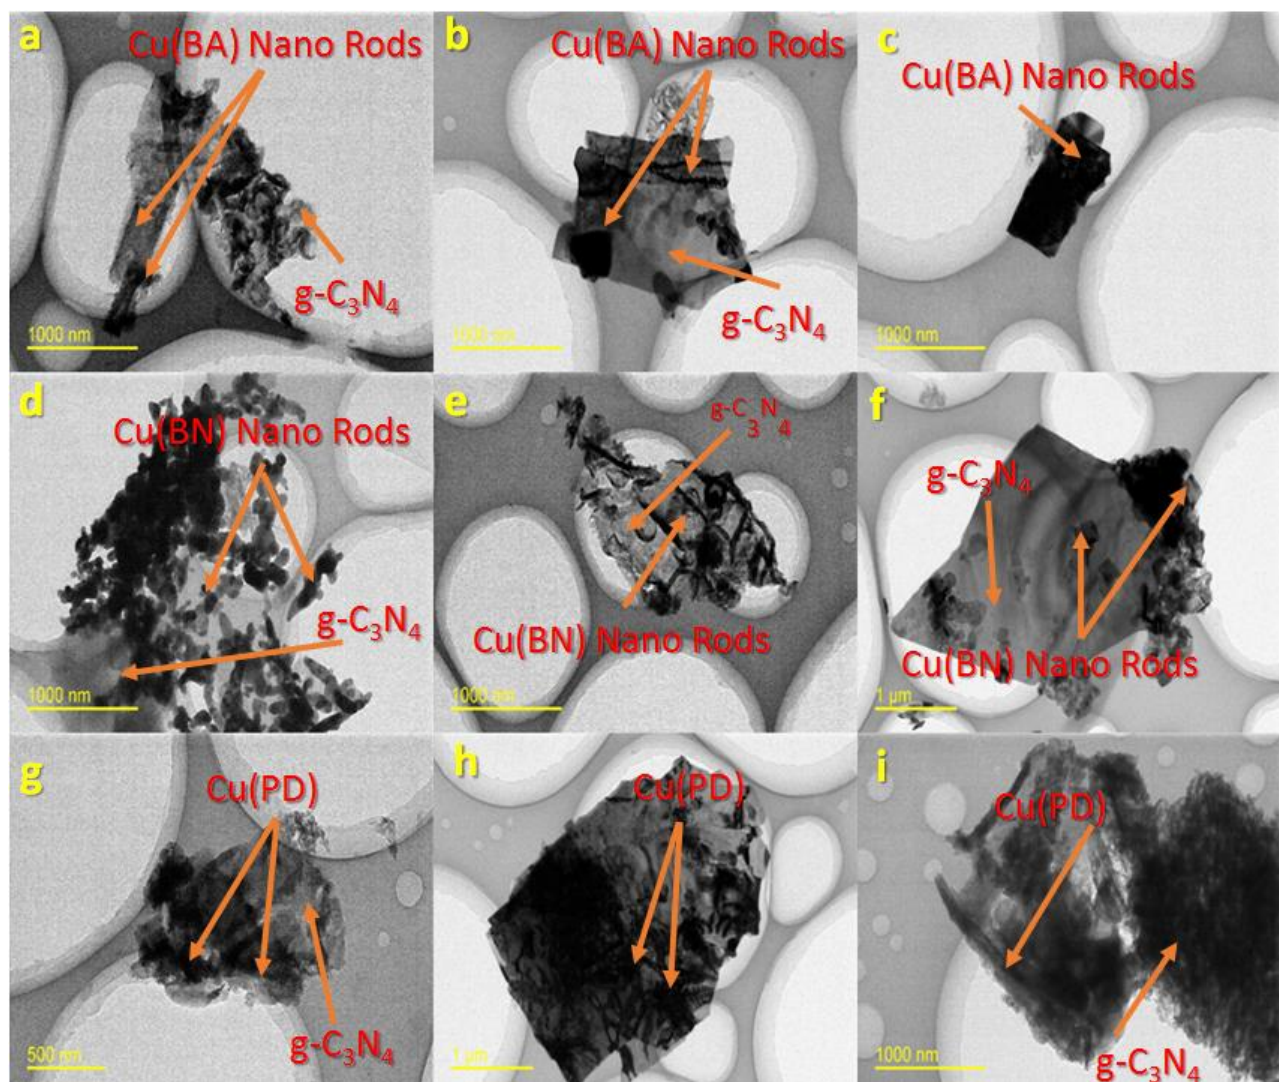

**Fig. S4.** TEM images of the photocatalysts after recycling four times. (a-c) CN-Cu(BA), (d-f) CN-Cu(BN) and (g-i) CN-Cu(PD).

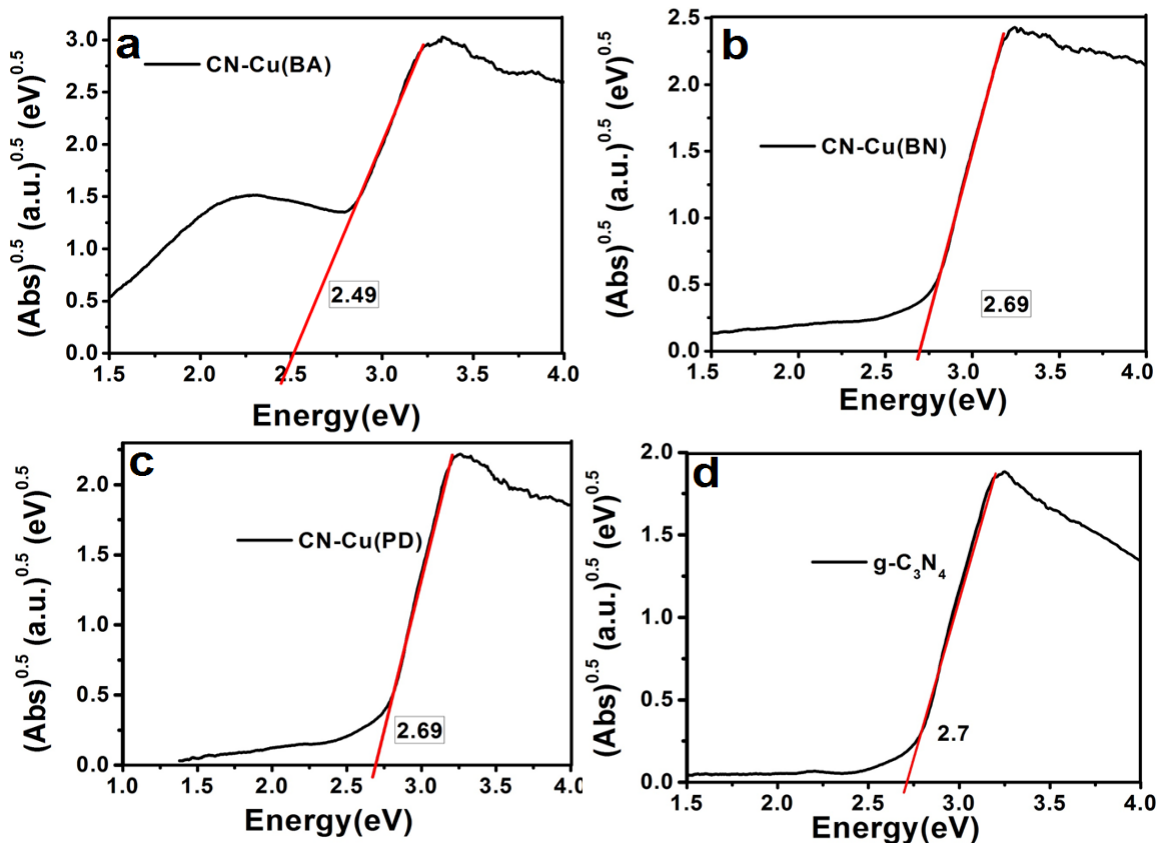

**Fig. S5.** Band energy level of (a) CN-Cu(BA), (b) CN-Cu(BN) and (c) CN-Cu(PD) and (d)  $g\text{-C}_3\text{N}_4$ .

### Supplementary Table

**Supplementary Table 1.**  $\text{Cu}^{2+}$  ion concentrations in pure Cu complexes and modified samples obtained by ICP-MS.

| Sr. No. | Sample Code | Conc. in (ppb) | Volume (l) | weight (g) | Wt. % of $\text{Cu}^{2+}$ |
|---------|-------------|----------------|------------|------------|---------------------------|
| 1       | CN-Cu(BN)   | 21.44840536    | 0.1        | 0.0108     | 0.020                     |
| 2       | CN-Cu(PD)   | 25.67618629    | 0.1        | 0.0124     | 0.021                     |
| 3       | CN-Cu(BA)   | 24.92075327    | 0.1        | 0.013      | 0.019                     |
| 4       | Cu(BN)      | 24216.99258    | 0.1        | 0.0151     | 16.038                    |
| 5       | Cu(PD)      | 22902.61296    | 0.1        | 0.0117     | 19.575                    |
| 6       | Cu(BA)      | 11437.55443    | 0.1        | 0.0113     | 10.122                    |

# $^1\text{H}$ NMR Spectra of Cu Complexes

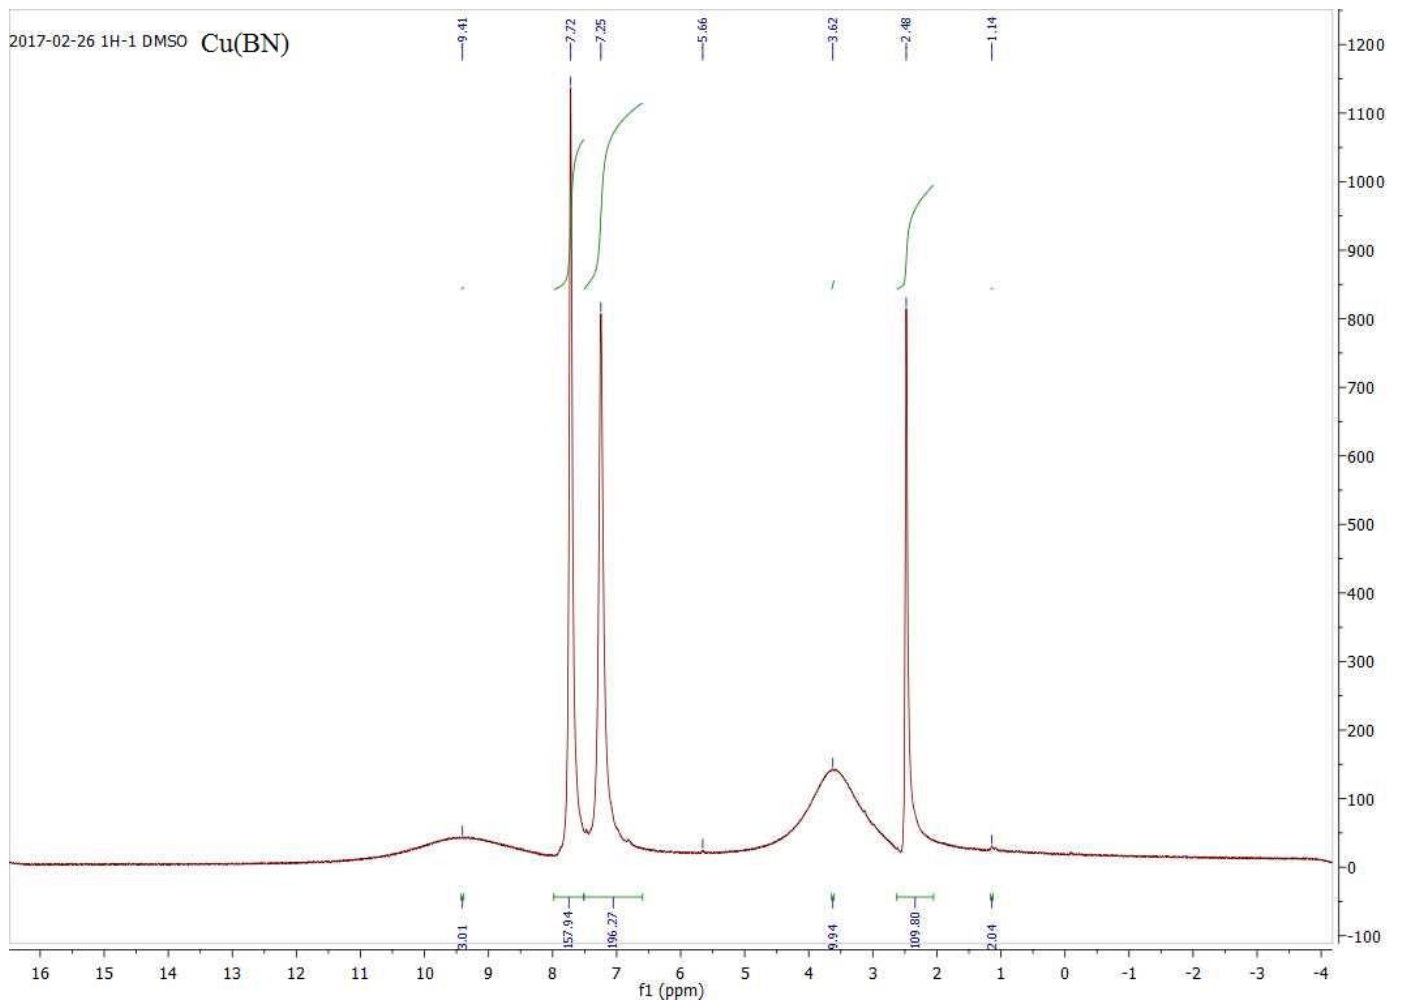



2017-02-26 1H-3 DMSO Cu(PD)

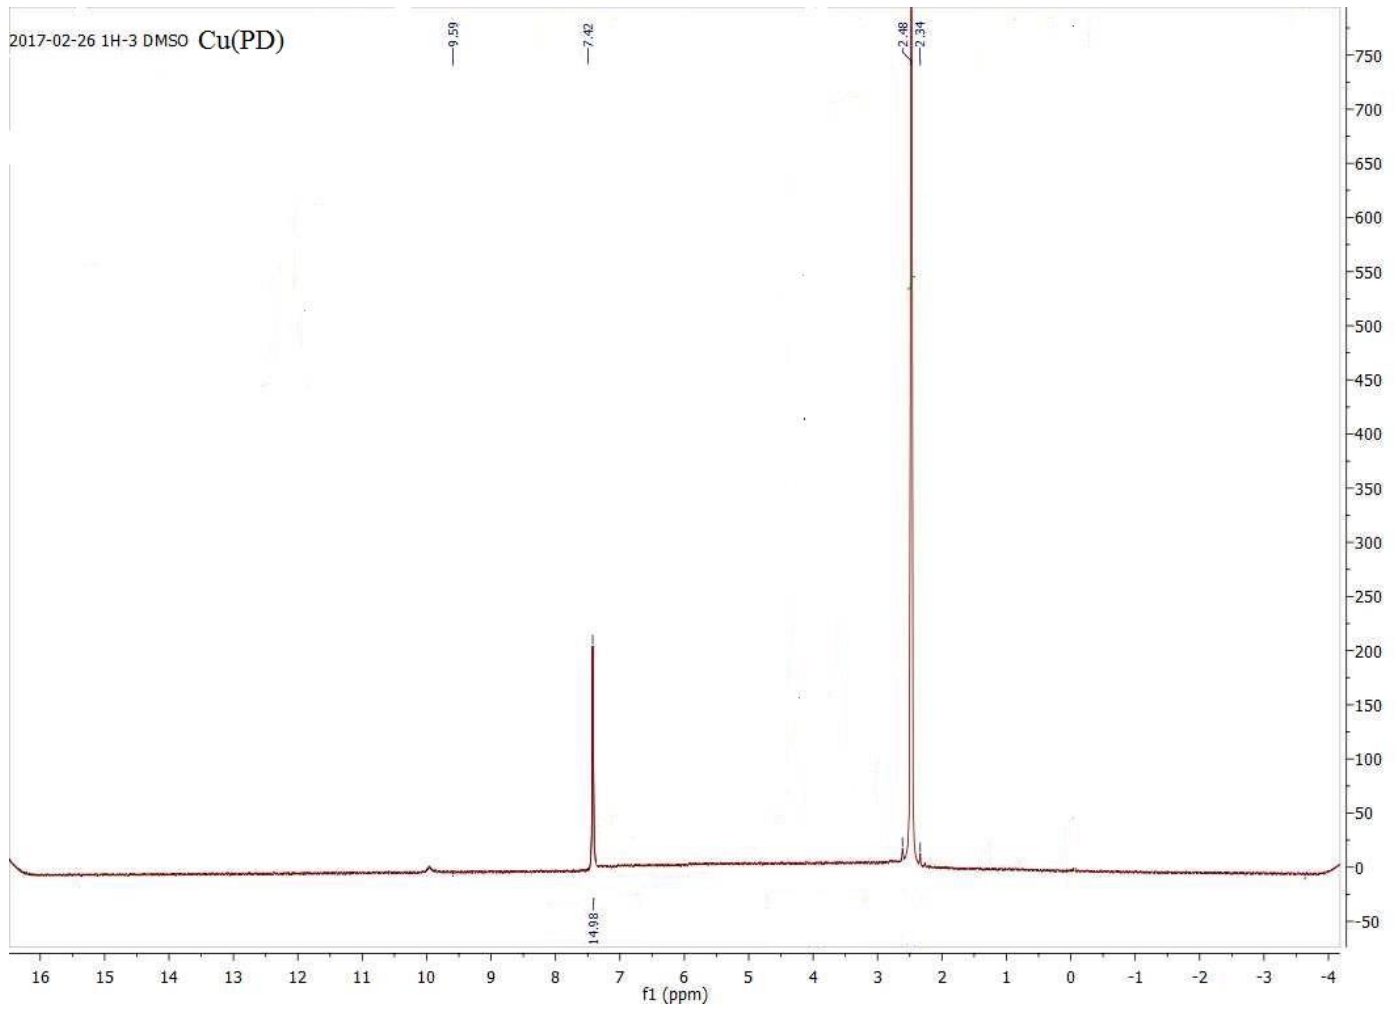



2017-02-26 1H-3 DMSO Cu(BA)

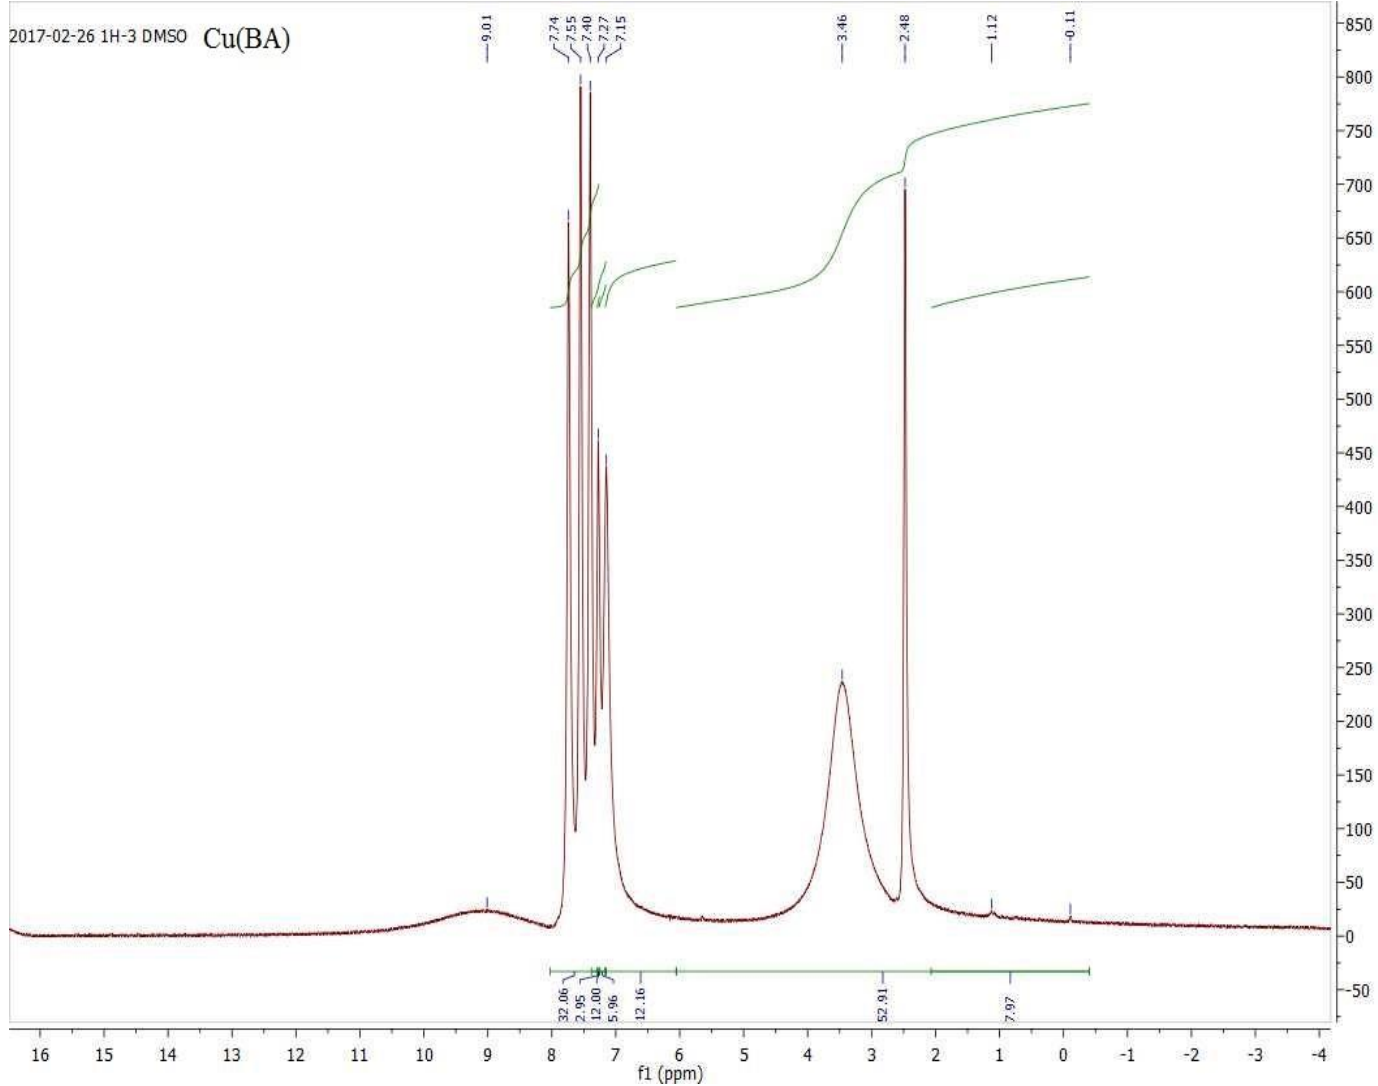

Supplement: c7cy00420f1.pdf [file c7cy00420f1.pdf]
